# Supplementary material
Source: MDPI journal article supplement (https://www.mdpi.com/2311-7524/5/4/79)
Supplement: s1 [file s1]

# Supplementary Materials: Interaction of Tomato Genotypes and Arbuscular Mycorrhizal Fungi under Reduced Irrigation

Domenico Ronga <sup>1,2†</sup>, Federica Caradonia <sup>1,\*†</sup>, Enrico Francia <sup>1</sup>, Caterina Morcia <sup>3</sup>, Fulvia Rizza <sup>3</sup>, Franz-W. Badeck <sup>3</sup>, Roberta Ghizzoni <sup>3</sup> and Valeria Terzi <sup>3</sup>

Table S1. Physiological parameters measured after treatment.

| Genotype | Treatment | Irrigation   | Chl <sup>z</sup>             | Flav                 | NBI              | Anth     |            |       |            |          |
|----------|-----------|--------------|------------------------------|----------------------|------------------|----------|------------|-------|------------|----------|
| Everton  | M-        | full-watered | <b>22.32±3.7<sup>y</sup></b> | <b>g<sup>x</sup></b> | 0.74±0.09        | bc       | 38.98±3.3  | defgh | 0.22±0.003 | abcd     |
|          |           | reduced      | 32.77±1.8                    | abcd                 | 0.65±0.03        | <b>c</b> | 50.14±2.6  | ab    | 0.19±0.003 | bcd      |
|          | MF+       | full-watered | <b>21.69±2.1</b>             | <b>g</b>             | 0.72±0.05        | bc       | 36.52±3.4  | efghi | 0.22±0.008 | abc      |
|          |           | reduced      | 31.69±2.6                    | bcde                 | 0.69±0.05        | bc       | 45.67±3.2  | bcd   | 0.19±0.009 | bcd      |
|          | MR+       | full-watered | 27.75±2.4                    | cdefg                | 0.86±0.09        | ab       | 32.83±5.0  | fghi  | 0.24±0.033 | <b>a</b> |
|          |           | reduced      | <b>39.35±6.6</b>             | <b>a</b>             | 0.72±0.03        | bc       | 54.58±5.6  | a     | 0.20±0.015 | abcd     |
| H3402    | M-        | full-watered | 25.67±2.7                    | defg                 | 0.87±0.09        | ab       | 29.75±4.2  | i     | 0.24±0.014 | <b>a</b> |
|          |           | reduced      | 31.18±1.3                    | bcdef                | <b>0.99±0.17</b> | <b>a</b> | 32.18±4.9  | ghi   | 0.23±0.015 | abc      |
|          | MF+       | full-watered | 23.68±1.8                    | fg                   | 0.75±0.09        | bc       | 31.69±2.2  | ghi   | 0.18±0.101 | d        |
|          |           | reduced      | 33.88±1.8                    | <b>abc</b>           | 0.77±0.08        | bc       | 44.16±3.6  | bcde  | 0.20±0.085 | abcd     |
|          | MR+       | full-watered | 23.95±1.1                    | fg                   | 0.78±0.08        | bc       | 30.90±4.12 | hi    | 0.23±0.010 | ab       |
|          |           | reduced      | 30.40±2.4                    | bcdef                | 0.77±0.15        | bc       | 40.63±6.0  | cdef  | 0.20±0.005 | abcd     |
| Pearson  | M-        | full-watered | 25.80±0.6                    | defg                 | 0.63±0.02        | <b>c</b> | 40.86±1.0  | cdef  | 0.22±0.009 | abc      |
|          |           | reduced      | 24.30±1.4                    | efg                  | 0.61±0.04        | <b>c</b> | 39.71±4.0  | cdefg | 0.21±0.009 | abcd     |
|          | MF+       | full-watered | 27.69±2.2                    | cdefg                | <b>0.99±0.03</b> | <b>a</b> | 31.13±10.5 | hi    | 0.23±0.036 | abc      |
|          |           | reduced      | 35.13±6.4                    | <b>ab</b>            | 0.73±0.09        | bc       | 47.88±4.7  | abc   | 0.18±0.021 | cd       |
|          | MR+       | full-watered | 24.97±2.7                    | efg                  | 0.72±0.17        | bc       | 35.83±4.9  | fghi  | 0.24±0.013 | ab       |
|          |           | reduced      | 30.01±5.6                    | bcdef                | 0.63±0.03        | <b>c</b> | 47.37±7.9  | abc   | 0.20±0.015 | abcd     |

<sup>z</sup>Abbreviations: Chl = index of the leaf chlorophyll content measured using Dx4 Flav = index of the leaf epidermal flavonoid content measured using Dx4, NBI = nitrogen balance index, Anth = index of the leaf anthocyanin content measured using Dx4, M- = control without mycorrhizae, MF+ = seedlings inoculated with *Funneliformis mosseae*, MR+ = seedlings inoculated with *Rhizophagus intraradices*, G = genotype, M = mycorrhizae treatment, I = irrigation regime.

<sup>y</sup>Data are presented as mean  $\pm$  standard deviation (SD, n = 5).

<sup>x</sup>Identical letters indicate differences among treatments or genotypes that are not statistically different by one-way ANOVA followed by DMRT at  $P < 0.05$ , ns = not significant.

**Table S2.** Morphological parameters measured at the end of the experiment.

| Genotype | Treatment | Irrigation   | H <sup>z</sup> (cm)    |                 | D (mm)   |       | H D <sup>-1</sup> |      | LEAVES (no.) |      | LA (m <sup>2</sup> plant <sup>-1</sup> ) |      | LMA (g m <sup>-2</sup> ) |      |
|----------|-----------|--------------|------------------------|-----------------|----------|-------|-------------------|------|--------------|------|------------------------------------------|------|--------------------------|------|
| Everton  | M-        | full-watered | 32.12±1.4 <sup>y</sup> | ab <sup>x</sup> | 4.76±0.1 | cdefg | 67.59±3.8         | ab   | 7.75±0.8     | a    | 0.053±0.012                              | cde  | 9.15±0.1                 | def  |
|          |           | reduced      | 23.50±1.5              | cd              | 4.20±0.2 | hi    | 56.07±3.7         | cde  | 6.83±0.4     | cde  | 0.034±0.001                              | fg   | 13.52±2.2                | bc   |
|          | MF+       | full-watered | 30.90±0.9              | ab              | 5.16±0.3 | abc   | 60.12±4.7         | cde  | 7.70±0.4     | ab   | 0.055±0.016                              | bcde | 11.46±2.4                | bcd  |
|          |           | reduced      | 25.40±1.0              | c               | 4.32±0.3 | ghi   | 59.11±4.1         | cde  | 6.80±0.4     | cde  | 0.041±0.012                              | efg  | 8.98±2.4                 | def  |
|          | MR+       | full-watered | 30.00±1.5              | b               | 4.87±0.1 | cdef  | 61.67±3.0         | bcd  | 7.10±0.5     | abcd | 0.043±0.003                              | defg | 10.72±2.9                | cde  |
|          |           | reduced      | 24.25±1.0              | c               | 4.49±0.4 | defgh | 54.57±6.5         | defg | 7.13±0.4     | abcd | 0.054±0.010                              | bcde | 6.56±1.4                 | f    |
| H3402    | M-        | full-watered | 30.50±1.5              | ab              | 4.95±0.3 | cde   | 61.74±4.3         | bcd  | 6.70±0.4     | cdef | 0.056±0.01                               | bcde | 10.05±3.3                | cdef |
|          |           | reduced      | 24.30±1.1              | c               | 4.42±0.3 | efghi | 55.04±2.7         | def  | 6.50±0.2     | def  | 0.058±0.006                              | bcd  | 13.06±2.4                | bc   |
|          | MF+       | full-watered | 31.50±2.1              | ab              | 5.01±0.2 | bcd   | 62.91±2.9         | bc   | 6.50±0.2     | def  | 0.076±0.005                              | a    | 6.44±0.6                 | f    |
|          |           | reduced      | 19.60±3.1              | e               | 4.11±0.4 | hi    | 47.57±5.5         | g    | 6.00±0.7     | f    | 0.042±0.013                              | defg | 17.31±4.1                | a    |
|          | MR+       | full-watered | 31.12±1.4              | ab              | 4.35±0.6 | fghi  | 73.45±8.9         | a    | 6.38±0.2     | def  | 0.070±0.018                              | ab   | 9.18±2.0                 | def  |
|          |           | reduced      | 21.62±1.2              | de              | 4.50±0.2 | defgh | 48.09±1.6         | fg   | 6.50±0.2     | def  | 0.055±0.002                              | bcde | 10.95±1.7                | cd   |
| Pearson  | M-        | full-watered | 30.38±1.5              | ab              | 5.47±0.3 | ab    | 55.72±3.0         | cde  | 6.50±0.2     | def  | 0.049±0.004                              | cdef | 6.95±0.7                 | ef   |
|          |           | reduced      | 24.78±0.5              | c               | 3.91±0.1 | i     | 63.36±2.4         | bc   | 6.10±0.5     | ef   | 0.031±0.007                              | g    | 8.64±1.2                 | def  |
|          | MF+       | full-watered | 32.50±1.6              | ab              | 5.61±0.2 | a     | 57.89±0.8         | cde  | 7.00±0.5     | bcd  | 0.054±0.012                              | bcde | 7.96±2.2                 | def  |
|          |           | reduced      | 25.40±1.5              | c               | 4.38±0.2 | fghi  | 58.20±5.9         | cde  | 7.30±0.8     | abc  | 0.032±0.009                              | g    | 14.84±4.5                | ab   |
|          | MR+       | full-watered | 32.80±1.8              | a               | 4.83±0.5 | cdefg | 68.44±5.9         | ab   | 7.30±0.4     | abc  | 0.062±0.007                              | abc  | 6.28±0.4                 | f    |
|          |           | reduced      | 23.80±0.6              | cd              | 4.46±0.6 | efgh  | 53.37±3.1         | efg  | 6.48±0.8     | def  | 0.043±0.008                              | defg | 7.84±3.4                 | def  |

<sup>z</sup>Abbreviations: H = height of seedlings, D = stem diameter of seedlings, H D<sup>-1</sup> = height to diameter ratio, LN (no.) = number of leaves per seedling, LA = leaf area, LMA = leaf mass area, M- = control without mycorrhizae, MF+ = seedlings inoculated with *Funneliformis mosseae*, MR+ = seedlings inoculated with *Rhizophagus intraradices*, F = genotype, M = mycorrhizae treatment, I = irrigation regime. \* = interaction.

<sup>y</sup>Data are presented as mean ± standard deviation (SD, n = 5).

<sup>x</sup>Identical letters indicate differences among treatments or genotypes that are not statistically different by one-way ANOVA followed by DMRT at  $P < 0.05$ , ns = not significant.

Table S3. Biomass parameters measured after treatment.

| Genotype | Treatment | Irrigation   | LDW <sup>z</sup><br>(g plant <sup>-1</sup> ) |                    | SDW<br>(g plant <sup>-1</sup> ) |          | RDW<br>(g plant <sup>-1</sup> ) |          | TDW<br>(g plant <sup>-1</sup> ) |          | ROOT/SHOOT       |          |
|----------|-----------|--------------|----------------------------------------------|--------------------|---------------------------------|----------|---------------------------------|----------|---------------------------------|----------|------------------|----------|
| Everton  | M-        | full-watered | 0.49±0.11 <sup>y</sup>                       | cdefg <sup>x</sup> | 0.31±0.02                       | abc      | 0.34±0.04                       | cdef     | 1.13±0.13                       | cde      | 0.43±0.09        | defg     |
|          |           | reduced      | 0.46±0.08                                    | defg               | 0.11±0.01                       | h        | 0.37±0.14                       | cde      | 0.94±0.23                       | def      | 0.64±0.16        | abc      |
|          | MF+       | full-watered | 0.60±0.09                                    | bcd                | 0.29±0.04                       | abc      | 0.40±0.06                       | bcd      | 1.30±0.17                       | bc       | 0.45±0.06        | bcdefg   |
|          |           | reduced      | 0.36±0.09                                    | gh                 | 0.21±0.06                       | defg     | 0.25±0.05                       | efg      | 0.81±0.19                       | efg      | 0.44±0.05        | cdefg    |
|          | MR+       | full-watered | 0.46±0.13                                    | defg               | 0.24±0.04                       | bcdef    | 0.31±0.11                       | def      | 1.02±0.25                       | cde      | 0.44±0.17        | cdefg    |
|          |           | reduced      | 0.34±0.05                                    | gh                 | 0.24±0.08                       | bcdef    | 0.33±0.07                       | cdef     | 0.92±0.07                       | def      | 0.64±0.35        | ab       |
| H3402    | M-        | full-watered | 0.52±0.11                                    | bcdef              | 0.23±0.05                       | cdef     | 0.48±0.18                       | bc       | 1.23±0.32                       | bcd      | 0.62±0.16        | abcd     |
|          |           | reduced      | 0.75±0.15                                    | <b>a</b>           | 0.28±0.08                       | abcd     | 0.73±0.20                       | <b>a</b> | <b>1.77±0.40</b>                | <b>a</b> | <b>0.71±0.11</b> | <b>a</b> |
|          | MF+       | full-watered | 0.49±0.05                                    | cdefg              | 0.27±0.01                       | bcde     | 0.37±0.04                       | cde      | 1.13±0.04                       | cde      | 0.49±0.07        | bcdefg   |
|          |           | reduced      | 0.67±0.11                                    | ab                 | 0.26±0.12                       | bcdef    | 0.53±0.09                       | <b>b</b> | 1.46±0.29                       | <b>b</b> | 0.59±0.08        | abcdef   |
|          | MR+       | full-watered | 0.63±0.08                                    | abc                | 0.20±0.02                       | defg     | 0.39±0.14                       | bcde     | 1.22±0.37                       | bcd      | 0.45±0.07        | bcdefg   |
|          |           | reduced      | 0.60±0.09                                    | bcde               | 0.18±0.04                       | fgh      | 0.47±0.06                       | bc       | 1.24±0.19                       | bcd      | 0.61±0.04        | abcde    |
| Pearson  | M-        | full-watered | 0.34±0.01                                    | gh                 | 0.19±0.04                       | efg      | 0.16±0.04                       | <b>g</b> | 0.69±0.07                       | fg       | <b>0.31±0.07</b> | <b>g</b> |
|          |           | reduced      | 0.27±0.06                                    | h                  | 0.11±0.02                       | h        | 0.15±0.03                       | <b>g</b> | 0.53±0.10                       | <b>g</b> | 0.40±0.07        | fg       |
|          | MF+       | full-watered | 0.42±0.10                                    | fgh                | 0.32±0.07                       | ab       | 0.31±0.03                       | def      | 1.05±0.03                       | cde      | 0.42±0.04        | efg      |
|          |           | reduced      | 0.44±0.07                                    | efg                | 0.36±0.05                       | <b>a</b> | 0.40±0.04                       | bcd      | 1.20±0.15                       | bcd      | 0.50±0.04        | bcdefg   |
|          | MR+       | full-watered | 0.39±0.03                                    | fgh                | 0.24±0.06                       | bcdef    | 0.22±0.07                       | fg       | 0.85±0.07                       | ef       | <b>0.34±0.07</b> | <b>g</b> |
|          |           | reduced      | 0.33±0.12                                    | gh                 | 0.14±0.04                       | gh       | 0.22±0.10                       | fg       | 0.69±0.25                       | fg       | 0.47±0.16        | bcdefg   |

<sup>z</sup>Abbreviations: LDW = leaf dry weight, SDW = stem dry weight, RDW = root dry weight, TDW = total dry weight, Root Shoot<sup>-1</sup> = root to shoot ratio, M- = control without mycorrhizae, MF+ = seedlings inoculated with *Funneliformis mosseae*, MR+ = seedlings inoculated with *Rhizophagus intraradices*, F = genotype, M = mycorrhizae treatment, I = irrigation regime.

<sup>y</sup>Data are presented as mean ± standard deviation (SD, n = 5).

<sup>x</sup>Identical letters indicate differences among treatments or genotypes that are not statistically different by ANOVA followed by DMRT at p < 0.05, ns = not significant.

**Table S4.** Water use parameters measured after treatment.

| Genotype | Treatment | Irrigation   | TWU <sup>z</sup><br>(g H <sub>2</sub> O plant <sup>-1</sup> ) |                 | WUE<br>(g H <sub>2</sub> O g dry weight <sup>-1</sup> ) |           |
|----------|-----------|--------------|---------------------------------------------------------------|-----------------|---------------------------------------------------------|-----------|
| Everton  | M-        | full-watered | 421.60±61 <sup>y</sup>                                        | ab <sup>x</sup> | 0.0027±0.0001                                           | fg        |
|          |           | reduced      | 156.80±47                                                     | f               | 0.0061±0.0003                                           | <b>bc</b> |
|          | MF+       | full-watered | 456.60±47                                                     | a               | 0.0028±0.0002                                           | fg        |
|          |           | reduced      | 166.60±48                                                     | ef              | 0.0049±0.0003                                           | d         |
|          | MR+       | full-watered | 415.60±113                                                    | ab              | 0.0025±0.0002                                           | fg        |
|          |           | reduced      | 208.10±13                                                     | ef              | 0.0044±0.0003                                           | de        |
| H3402    | M-        | full-watered | 389.00±99                                                     | abc             | 0.0032±0.0003                                           | fg        |
|          |           | reduced      | 248.00±40                                                     | de              | 0.0071±0.0009                                           | b         |
|          | MF+       | full-watered | 378.50±59                                                     | abc             | 0.0031±0.0004                                           | fg        |
|          |           | reduced      | 169.00±27                                                     | ef              | <b>0.0086±0.0009</b>                                    | <b>a</b>  |
|          | MR+       | full-watered | 346.40±99                                                     | bc              | 0.0036±0.0007                                           | ef        |
|          |           | reduced      | 191.70±36                                                     | ef              | 0.0065±0.0003                                           | b         |
| Pearson  | M-        | full-watered | 320.00±56                                                     | cd              | 0.0022±0.0003                                           | g         |
|          |           | reduced      | 64.30±16                                                      | g               | <b>0.0084±0.0015</b>                                    | <b>a</b>  |
|          | MF+       | full-watered | 377.80±52                                                     | abc             | 0.0028±0.0000                                           | fg        |
|          |           | reduced      | 151.70±48                                                     | f               | <b>0.0084±0.0021</b>                                    | <b>a</b>  |
|          | MR+       | full-watered | 303.00±84                                                     | cd              | 0.0029±0.0005                                           | fg        |
|          |           | reduced      | 145.70±67                                                     | f               | 0.0053±0.00015                                          | cd        |

<sup>z</sup>Abbreviations: TWU = Total water used, WUE = water use efficiency, M- = control without mycorrhizae, MF+ = seedlings inoculated with *Funneliformis mosseae*, MR+ = seedlings inoculated with *Rhizophagus intraradices*, F = genotype, M = mycorrhizae treatment, I = irrigation regime.

<sup>y</sup>Data are presented as mean ± standard deviation (SD, n = 5).

<sup>x</sup>Identical letters indicate differences among treatments or genotypes that are not statistically different by one-way ANOVA followed by DMRT at  $p < 0.05$ , ns = not significant.

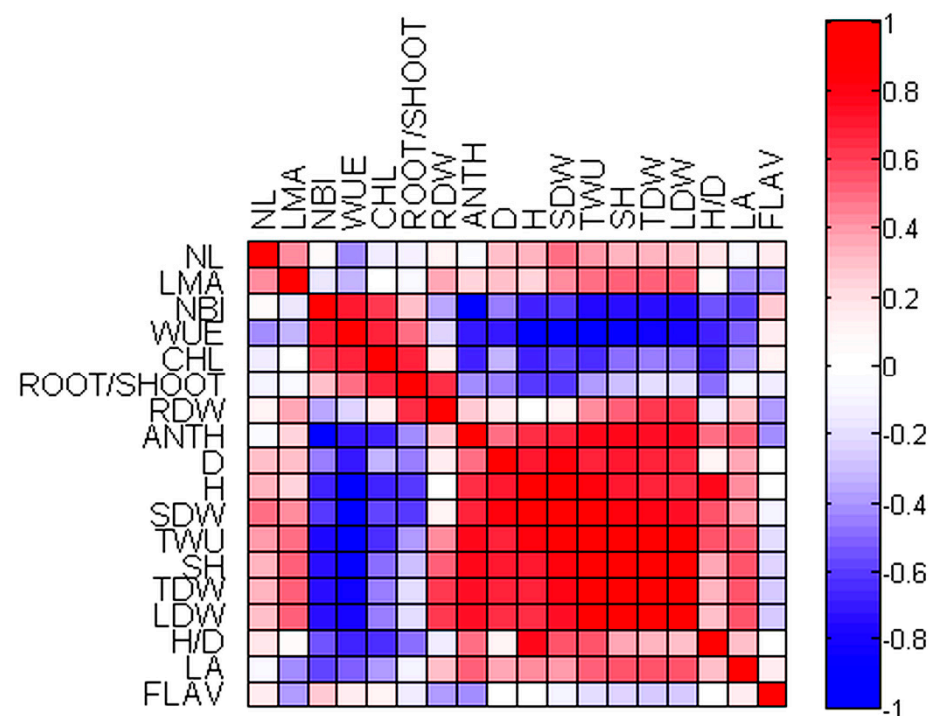

**Figure S1.** Correlation plot. Abbreviations: CHL = index of the chlorophyll content in leaf measured using Dx4; FLAV = index of the flavonoids content in leaf measured using DUALX instrument; NBI = nitrogen balance index, ANTH = index of the anthocyanins content in leaf measured using Dx4, H = height of seedling; D = diameter of seedling; H/D = height and diameter ratio of seedling; NL = number of fully expanded leaves per seedling; LA = leaf area of the seedling; LMA = leaf mass area of the seedling; LDW = leaf dry weight; SDW = stem dry weight; RDW = root dry weight; SH = shoot weight (LDW+SDW); TDW = total dry weight of the seedling; ROOT/SHOOT = root and shoot ratio; TWU = total water used by seedling; WUE = water use efficiency.
